# Supplementary material
Source: HighWire-hosted journal article supplement (https://erj.ersjournals.com/content/60/4/2200633)
Supplement: inline-supplementary-material-1 [file inline-supplementary-material-1.pdf]

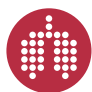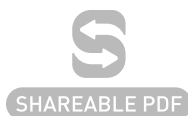

# Natural decline in pulmonary function following bilateral lung transplantation: a single-centre study

Geert M. Verleden<sup>1,2</sup>, Robin Vos <sup>1,2</sup>, Laurent Godinas<sup>1,2</sup>, Stijn E. Verleden<sup>3</sup>, Dirk E. Van Raemdonck <sup>2,4</sup> and Laurens J. Ceulemans<sup>2,4</sup>

<sup>1</sup>University Hospital Gasthuisberg, Dept Respir Dis and Lung Transplantation Unit, Leuven, Belgium. <sup>2</sup>KULeuven, dept CHROMETA, Breathe Lab, Leuven, Belgium. <sup>3</sup>Dept of Thoracic and Vascular Surgery and Pneumology, UZA/University Hospital Antwerp, Edegem, Belgium. <sup>4</sup>University Hospital Gasthuisberg, Dept Thor Surgery, Leuven, Belgium.

Corresponding author: Geert M. Verleden ([geert.verleden@uzleuven.be](mailto:geert.verleden@uzleuven.be))

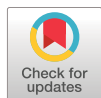

Shareable abstract (@ERSpublications)

**After bilateral lung transplantation, the natural decline in FEV<sub>1</sub> is only slightly increased compared to normal physiological ageing decline in FEV<sub>1</sub> in healthy subjects** <https://bit.ly/3pwkrqg>

**Cite this article as:** Verleden GM, Vos R, Godinas L, *et al.* Natural decline in pulmonary function following bilateral lung transplantation: a single-centre study. *Eur Respir J* 2022; 60: 2200633 [DOI: 10.1183/13993003.00633-2022].

This single-page version can be shared freely online.

Copyright ©The authors 2022.  
For reproduction rights and  
permissions contact  
[permissions@ersnet.org](mailto:permissions@ersnet.org)

Received: 25 March 2022  
Accepted: 11 Aug 2022

## To the Editor:

Lung transplantation is an established treatment option for well-selected patients with end-stage pulmonary disease, when other therapeutic options are no longer available. Although post-transplant survival has much improved in recent years, the development of chronic lung allograft dysfunction (CLAD), which affects 40–50% of all patients by 5 years post-transplant, remains the major cause of morbidity and mortality [1]. CLAD is defined by a progressive and persistent decline in the forced expiratory volume in the first second (FEV<sub>1</sub>) of at least 20% compared to the postoperative best value. Several different phenotypes of CLAD have been identified, based on the physiology of the lung function decline, such as obstructive (bronchiolitis obliterans syndrome; BOS), restrictive (restrictive allograft syndrome) or a combination (mixed phenotype), along with the presence or absence of persistent opacities on chest imaging [2, 3]. One of the problems that may arise when interpreting post-transplant lung function decline is that the natural decline in FEV<sub>1</sub> after lung transplantation is unknown at present. Indeed, normal physiological ageing is characterised by a progressive decline in FEV<sub>1</sub>, and in long-term follow up studies (>10 years,) the decline in FEV<sub>1</sub> in healthy individuals varied between 17.7 and 46.4 mL per year (median 22.4 mL per year) [4]. Furthermore, it is also known that physiologically ageing lungs may become slightly obstructive [5], at least in part due to loss of small airways [6]. This is now taken into account when using the Global Lung Function Initiative predictive lung function parameters [7]. As a consequence, in lung transplant patients with a long-term follow up (>10 years), the ageing-related decline in FEV<sub>1</sub> may at some time confound the diagnosis of CLAD.
